# Supplementary material for: Role of Neuron–Glia Signaling in Regulation of Retinal Vascular Tone in Rats
Source: MDPI journal article supplement (doi:10.3390/ijms20081952), 2019-04-20
Supplement: s1 [file s1]

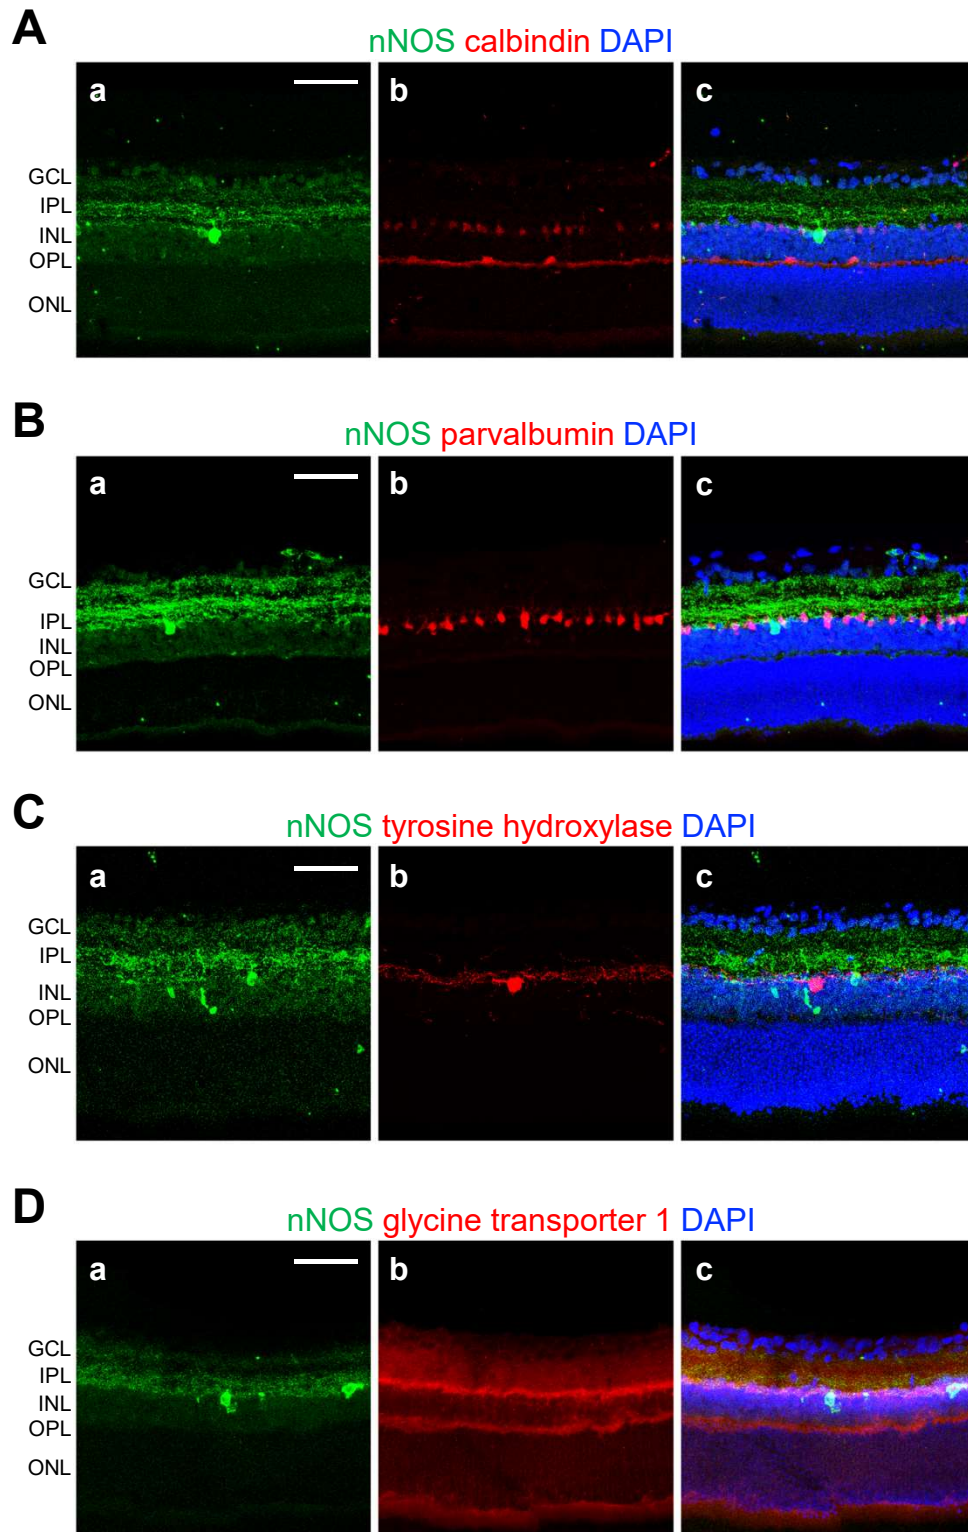

Supplementary Figure 1. Co-labeling of neuronal NO synthase (nNOS) with amacrine cell markers in the retina. Confocal microscopy images of retinal cross-sections labeled with anti-nNOS and anti-calbindin-D-28K (A), anti-parvalbumin (B), anti-tyrosine hydroxylase (C), and anti-glycine transporter 1 (D). The co-localization of nNOS immunoreactivities with glycine transporter 1-, tyrosine hydroxylase-, parvalbumin-, calbindin-D-28K-positive cells were not detected. Scale bar: 50  $\mu$ m. DAPI, 4',6-diamidino-2-phenylindole; IPL, inner plexiform layer; OPL, outer plexiform layer; ONL, outer nuclear layer.
